# Supplementary material for: The Arabidopsis Deubiquitylase OTU5 Suppresses Flowering by Histone Modification-Mediated Activation of the Major Flowering Repressors FLC, MAF4, and MAF5
Source: MDPI journal article supplement (doi:10.3390/ijms24076176), 2023-03-24
Supplement: s1 [file s1]

**Table S7.** Comparison of log<sub>2</sub> fold change of 42 upregulated loci that are overlapped between *otu5*, *arp6*, and *otu5 arp6* mutants<sup>a</sup>.

| Locus     | probe ID     | <i>otu5</i> | <i>arp6</i> | <i>db</i> | <i>db - otu5</i> | <i>db - arp6</i> | description                                                                       |
|-----------|--------------|-------------|-------------|-----------|------------------|------------------|-----------------------------------------------------------------------------------|
| AT1G02660 | A_84_P12738  | 1.341       | 2.782       | 2.187     | 0.846            | -0.594           | alpha/beta-Hydrolases superfamily protein                                         |
| AT1G08090 | A_84_P18587  | 1.178       | 2.267       | 1.578     | 0.400            | -0.689           | nitrate transporter 2:1                                                           |
| AT1G12610 | A_84_P16247  | 2.057       | 1.947       | 2.097     | 0.040            | 0.151            | Integrase-type DNA-binding superfamily protein                                    |
| AT1G21910 | A_84_P20470  | 1.386       | 2.338       | 1.613     | 0.227            | -0.726           | Integrase-type DNA-binding superfamily protein                                    |
| AT1G27045 | A_84_P836321 | 1.112       | 1.728       | 1.597     | 0.485            | -0.130           | Homeobox-leucine zipper protein family                                            |
| AT1G50040 | A_84_P10518  | 1.329       | 2.293       | 2.534     | 1.204            | 0.241            | formin-like protein, putative (DUF1005)                                           |
| AT1G65490 | A_84_P57860  | 1.346       | 1.761       | 1.993     | 0.647            | 0.232            | STMP5, a secreted peptide which functions in plant growth and pathogen defense    |
| AT1G70260 | A_84_P839203 | 1.471       | 1.852       | 1.016     | -0.455           | -0.836           | nodulin MtN21 /EamA-like transporter family protein                               |
| AT1G76650 | A_84_P14331  | 1.083       | 2.909       | 2.793     | 1.710            | -0.115           | calmodulin-like 38                                                                |
| AT1G79245 | A_84_P798768 | 1.181       | 1.189       | 1.025     | -0.156           | -0.163           | pseudogene of Winged helix-turn-helix transcription repressor DNA-binding protein |
| AT1G79245 | A_84_P803930 | 1.295       | 1.340       | 1.207     | -0.088           | -0.133           | pseudogene of Winged helix-turn-helix transcription repressor DNA-binding protein |
| AT2G17230 | A_84_P67674  | 3.358       | 3.551       | 3.963     | 0.605            | 0.412            | EXORDIUM like 5                                                                   |
| AT2G17230 | A_84_P800917 | 1.279       | 1.336       | 1.727     | 0.448            | 0.390            | EXORDIUM like 5                                                                   |
| AT2G17850 | A_84_P791417 | 1.891       | 1.722       | 1.348     | -0.543           | -0.374           | Rhodanese/Cell cycle control phosphatase superfamily protein                      |
| AT2G28780 | A_84_P297814 | 1.418       | 1.581       | 1.297     | -0.121           | -0.284           | P-hydroxybenzoic acid efflux pump subunit                                         |
| AT2G34600 | A_84_P610481 | 3.268       | 2.796       | 2.792     | -0.476           | -0.004           | jasmonate-zim-domain protein 7                                                    |
| AT2G39510 | A_84_P20167  | 2.250       | 1.046       | 1.806     | -0.445           | 0.759            | nodulin MtN21 /EamA-like transporter family protein                               |
| AT2G47520 | A_84_P23870  | 1.112       | 1.477       | 1.708     | 0.596            | 0.231            | ETHYLENE RESPONSE FACTOR 71 (ERF71), a member of the ERF/AP2 subfamily B-2        |
| AT3G19680 | A_84_P56760  | 1.677       | 2.380       | 2.560     | 0.883            | 0.180            | hypothetical protein (DUF1005)                                                    |
| AT3G19680 | A_84_P784688 | 1.753       | 2.388       | 2.698     | 0.945            | 0.310            | hypothetical protein (DUF1005)                                                    |
| AT3G19680 | A_84_P799394 | 1.281       | 2.110       | 2.413     | 1.131            | 0.303            | hypothetical protein (DUF1005)                                                    |
| AT3G50060 | A_84_P20325  | 1.046       | 1.577       | 1.595     | 0.549            | 0.018            | myb domain protein 77                                                             |
| AT3G55980 | A_84_P13733  | 1.178       | 2.127       | 1.622     | 0.444            | -0.505           | salt-inducible zinc finger 1                                                      |

|           |              |       |       |       |        |        |                                                                                         |
|-----------|--------------|-------|-------|-------|--------|--------|-----------------------------------------------------------------------------------------|
| AT3G57520 | A_84_P806643 | 1.089 | 1.030 | 1.395 | 0.307  | 0.365  | seed imbibition 2 (SIP2), a raffinose-specific alpha-galactosidase                      |
| AT3G59080 | A_84_P15635  | 1.077 | 2.400 | 2.137 | 1.060  | -0.262 | Eukaryotic aspartyl protease family protein                                             |
| AT4G01250 | A_84_P16606  | 1.078 | 1.691 | 1.055 | -0.023 | -0.636 | WRKY family transcription factor                                                        |
| AT4G08950 | A_84_P13790  | 1.460 | 2.764 | 2.937 | 1.477  | 0.173  | Phosphate-responsive 1 family protein                                                   |
| AT4G08950 | A_84_P811890 | 1.350 | 2.526 | 2.081 | 0.732  | -0.445 | Phosphate-responsive 1 family protein                                                   |
| AT4G08950 | A_84_P811894 | 1.158 | 2.621 | 2.385 | 1.228  | -0.236 | Phosphate-responsive 1 family protein                                                   |
| AT4G19520 | A_84_P835962 | 1.092 | 2.064 | 1.579 | 0.488  | -0.484 | disease resistance protein (TIR-NBS-LRR class) family                                   |
| AT4G32480 | A_84_P59510  | 1.289 | 1.670 | 2.186 | 0.897  | 0.516  | a putative sugar phosphate exchanger (DUF506)                                           |
| AT4G32480 | A_84_P818265 | 1.497 | 1.800 | 2.291 | 0.794  | 0.491  | a putative sugar phosphate exchanger (DUF506)                                           |
| AT4G32800 | A_84_P20495  | 1.056 | 1.898 | 1.902 | 0.847  | 0.004  | Integrase-type DNA-binding superfamily protein                                          |
| AT4G33070 | A_84_P22388  | 1.209 | 1.229 | 1.245 | 0.036  | 0.016  | Thiamine pyrophosphate dependent pyruvate decarboxylase family protein                  |
| AT4G34150 | A_84_P853187 | 1.081 | 2.309 | 1.477 | 0.396  | -0.832 | Calcium-dependent lipid-binding (CaLB domain) family protein                            |
| AT4G34410 | A_84_P11046  | 3.224 | 3.208 | 2.716 | -0.509 | -0.492 | redox responsive transcription factor 1                                                 |
| AT4G37260 | A_84_P14864  | 1.021 | 1.450 | 1.229 | 0.208  | -0.221 | myb domain protein 73                                                                   |
| AT4G39250 | A_84_P149018 | 1.646 | 1.630 | 2.391 | 0.744  | 0.760  | RAD-LIKE 1/RADIALIS-LIKE SANT/MYB 2/RSM2                                                |
| AT5G08150 | A_84_P560990 | 1.835 | 2.870 | 2.780 | 0.945  | -0.090 | suppressor of phytochrome b 5                                                           |
| AT5G10040 | A_84_P157965 | 1.764 | 1.935 | 1.173 | -0.590 | -0.761 | transmembrane protein                                                                   |
| AT5G10040 | A_84_P787492 | 1.648 | 1.887 | 1.359 | -0.289 | -0.528 | transmembrane protein                                                                   |
| AT5G14180 | A_84_P11129  | 1.234 | 1.207 | 1.674 | 0.439  | 0.466  | Myzus persicae-induced lipase 1                                                         |
| AT5G16570 | A_84_P52990  | 1.157 | 1.172 | 1.327 | 0.170  | 0.155  | glutamine synthetase 1;4                                                                |
| AT5G20250 | A_84_P14131  | 1.011 | 1.281 | 1.278 | 0.267  | -0.003 | Raffinose synthase family protein                                                       |
| AT5G25240 | A_84_P78199  | 1.171 | 1.291 | 1.978 | 0.807  | 0.687  | stress induced protein                                                                  |
| AT5G41080 | A_84_P56650  | 1.211 | 1.760 | 1.085 | -0.127 | -0.675 | GLYCEROPHOSPHODIESTER PHOSPHODIESTERASE 2 (GDPD2), a member of the PLC-like GDPD family |
| AT5G41080 | A_84_P790164 | 1.383 | 1.884 | 2.277 | 0.894  | 0.393  | GLYCEROPHOSPHODIESTER PHOSPHODIESTERASE 2 (GDPD2), a member of the PLC-like GDPD family |
| AT5G45340 | A_84_P12143  | 1.654 | 3.480 | 3.274 | 1.620  | -0.206 | cytochrome P450, family 707, subfamily A, polypeptide 3                                 |
| AT5G47600 | A_84_P575328 | 1.099 | 4.607 | 5.280 | 4.182  | 0.673  | HSP20-like chaperones superfamily protein                                               |

|           |              |       |       |       |        |        |                             |
|-----------|--------------|-------|-------|-------|--------|--------|-----------------------------|
| AT5G50790 | A_84_P15944  | 1.684 | 1.045 | 1.572 | -0.112 | 0.527  | Nodulin MtN3 family protein |
| AT5G67300 | A_84_P13173  | 1.342 | 1.628 | 1.718 | 0.376  | 0.090  | myb domain protein r1       |
| AT5G67300 | A_84_P807259 | 1.444 | 1.680 | 1.393 | -0.051 | -0.287 | myb domain protein r1       |

<sup>a</sup>Highted in yellow are loci showed further enhanced expression in double mutant in comparison with single mutants.
