# Supplementary material for: The Arabidopsis Deubiquitylase OTU5 Suppresses Flowering by Histone Modification-Mediated Activation of the Major Flowering Repressors FLC, MAF4, and MAF5
Source: MDPI journal article supplement (doi:10.3390/ijms24076176), 2023-03-24
Supplement: s1 [file s1]

**Table S8.** Comparison of log<sub>2</sub> fold change of 30 downregulated loci that are overlapped between *otu5*, *arp6*, and *otu5 arp6* mutants<sup>a</sup>.

| Locus     | probe ID     | <i>otu5</i> | <i>arp6</i> | <i>db</i> | <i>db - otu5</i> | <i>db - arp6</i> | description                                                                                                   |
|-----------|--------------|-------------|-------------|-----------|------------------|------------------|---------------------------------------------------------------------------------------------------------------|
| AT1G10585 | A_84_P237173 | -1.838      | -1.473      | -1.501    | 0.337            | -0.028           | basic helix-loop-helix (bHLH) DNA-binding superfamily protein                                                 |
| AT1G13470 | A_84_P562126 | -2.236      | -2.217      | -2.792    | -0.556           | -0.575           | hypothetical protein (DUF1262)                                                                                |
| AT1G13470 | A_84_P788748 | -2.777      | -2.316      | -3.330    | -0.553           | -1.014           | hypothetical protein (DUF1262)                                                                                |
| AT1G17840 | A_84_P816034 | -2.034      | -1.915      | -2.177    | -0.143           | -0.263           | white-brown complex-like protein                                                                              |
| AT1G32350 | A_84_P21945  | -1.868      | -1.303      | -2.013    | -0.145           | -0.710           | alternative oxidase 1D                                                                                        |
| AT1G33730 | A_84_P11346  | -1.140      | -1.098      | -1.065    | 0.075            | 0.033            | cytochrome P450, family 76, subfamily C, polypeptide 5                                                        |
| AT1G33960 | A_84_P23754  | -1.946      | -1.606      | -1.727    | 0.219            | -0.121           | P-loop containing nucleoside triphosphate hydrolases superfamily protein                                      |
| AT1G49570 | A_84_P23433  | -1.509      | -1.990      | -3.017    | -1.508           | -1.027           | Peroxidase superfamily protein                                                                                |
| AT1G54230 | A_84_P18149  | -1.014      | -1.324      | -1.316    | -0.302           | 0.008            | Winged helix-turn-helix transcription repressor DNA-binding protein                                           |
| AT1G66100 | A_84_P15283  | -1.147      | -1.533      | -4.017    | -2.871           | -2.484           | A PR protein belongs to the plant thionin (PR-13) family with multiple members                                |
| AT1G66570 | A_84_P151538 | -1.435      | -1.165      | -1.503    | -0.069           | -0.338           | sucrose-proton symporter 7                                                                                    |
| AT1G69530 | A_84_P16197  | -1.116      | -1.636      | -1.864    | -0.748           | -0.228           | Expansin A1, a member of alpha-expansin gene family                                                           |
| AT1G69530 | A_84_P815585 | -1.110      | -1.665      | -1.926    | -0.815           | -0.260           | Expansin A1, a member of alpha-expansin gene family                                                           |
| AT2G07030 | A_84_P15356  | -1.445      | -1.417      | -1.561    | -0.116           | -0.144           | A mutator-like transposase family member                                                                      |
| AT2G16005 | A_84_P513580 | -1.512      | -1.276      | -1.741    | -0.229           | -0.465           | INTERACTOR OF SYNAPTOTAGMIN1/ROSY1, a MD-2-related lipid recognition domain-containing protein                |
| AT2G19796 |              |             |             |           |                  |                  |                                                                                                               |
| AT2G19802 | A_84_P857107 | -1.124      | -1.047      | -1.066    | 0.057            | -0.020           | transmembrane protein                                                                                         |
| AT2G29460 | A_84_P14441  | -1.937      | -1.458      | -2.003    | -0.067           | -0.545           | glutathione S-transferase tau 4                                                                               |
| AT2G44240 | A_84_P81249  | -2.350      | -2.574      | -2.894    | -0.544           | -0.320           | NEP-interacting protein (DUF239)                                                                              |
| AT3G04717 | A_84_P760629 | -1.128      | -1.167      | -1.475    | -0.348           | -0.308           | pseudogene of pathogenesis-related 4                                                                          |
| AT3G27884 | A_84_P761753 | -1.259      | -1.067      | -1.601    | -0.342           | -0.534           | SHORT OPEN READING FRAME 3 (SORF3), identified as a translated small open reading frame by ribosome profiling |
| AT3G49340 | A_84_P20322  | -1.904      | -1.184      | -1.877    | 0.027            | -0.693           | Cysteine proteinases superfamily protein                                                                      |
| AT3G49540 | A_84_P566998 | -1.844      | -1.049      | -1.239    | 0.605            | -0.190           | hypothetical protein                                                                                          |

|           |              |        |        |        |         |         |                                                                         |
|-----------|--------------|--------|--------|--------|---------|---------|-------------------------------------------------------------------------|
| AT3G49620 | A_84_P20323  | -2.336 | -2.426 | -3.800 | - 1.464 | - 1.374 | 2-oxoglutarate (2OG) and Fe(II)-dependent oxygenase superfamily protein |
| AT5G10140 | A_84_P10170  | -2.376 | -1.744 | -3.343 | - 0.968 | - 1.600 | FLOWERING LOCUS C (FLC)                                                 |
| AT5G10140 | A_84_P784210 | -2.282 | -1.776 | -2.941 | - 0.659 | - 1.165 | FLOWERING LOCUS C (FLC)                                                 |
| AT5G10140 | A_84_P784401 | -2.381 | -1.780 | -3.527 | - 1.146 | - 1.747 | FLOWERING LOCUS C (FLC)                                                 |
| AT5G24200 | A_84_P585099 | -1.793 | -1.611 | -1.775 | 0.018   | - 0.164 | alpha/beta-Hydrolases superfamily protein                               |
| AT5G25640 | A_84_P558384 | -1.027 | -1.398 | -1.610 | - 0.582 | - 0.212 | Rhomboid-related intramembrane serine protease family protein           |
| AT5G26270 | A_84_P500750 | -1.591 | -1.879 | -1.657 | - 0.066 | 0.222   | transmembrane protein                                                   |
| AT5G35607 | A_84_P310863 | -1.320 | -1.205 | -1.613 | - 0.293 | - 0.408 | A mutator-like transposase family member                                |
| AT5G42280 | A_84_P23480  | -4.194 | -3.982 | -4.412 | - 0.218 | - 0.429 | Cysteine/Histidine-rich C1 domain family protein                        |
| AT5G47990 | A_84_P18772  | -1.118 | -1.151 | -1.121 | - 0.003 | 0.030   | cytochrome P450, family 705, subfamily A, polypeptide 5                 |
| AT5G47990 | A_84_P824880 | -1.078 | -1.084 | -1.480 | - 0.402 | - 0.396 | cytochrome P450, family 705, subfamily A, polypeptide 5                 |
| AT5G48000 | A_84_P19718  | -1.020 | -1.167 | -1.177 | - 0.158 | - 0.011 | cytochrome P450, family 708, subfamily A, polypeptide 2                 |

<sup>a</sup>Highted in yellow are loci showed further reduced expression in double mutant in comparison with single mutants.
