# Supplementary material for: The Arabidopsis Deubiquitylase OTU5 Suppresses Flowering by Histone Modification-Mediated Activation of the Major Flowering Repressors FLC, MAF4, and MAF5
Source: MDPI journal article supplement (doi:10.3390/ijms24076176), 2023-03-24
Supplement: s1 [file s1]

**Table S4.** PCR primer pairs used in this study.

| Gene/stock<br>/construct/PCR<br>fragment                                            | Primer pairs and note                                                                                                                                                                                            |
|-------------------------------------------------------------------------------------|------------------------------------------------------------------------------------------------------------------------------------------------------------------------------------------------------------------|
| <b>Amplification of T-DNA insertion junctions and corresponding wild-type genes</b> |                                                                                                                                                                                                                  |
| <i>otu1-1</i>                                                                       | Wild-type<br>T_OTU1_5': GAACCTCTGTCTAGTTTAGCTGCAGAG<br>T_OTU1_3': AGAATGTCATCTAGTTGCTCAAGGAAC<br>T-DNA junction<br>pROK2_LBa1: TGATGGTTCACGTAGTGGGCCATCGCCCTG<br>T_OTU1_3': AGAATGTCATCTAGTTGCTCAAGGAAC          |
| <i>otu2-1</i>                                                                       | Wild-type<br>T-OTU2-5': CTTTCATCGCGTTTGGTGTTCATCTTC<br>T-OTU2-3': GTTGCTTGCAACTGCTGCTGCTATCAC<br>T-DNA junction<br>T-OTU2-5': CTTTCATCGCGTTTGGTGTTCATCTTC<br>pROK2_LBa1: TGATGGTTCACGTAGTGGGCCATCGCCCTG          |
| <i>otu3-1</i>                                                                       | Wild-type<br>T-OTU3_03: GGCTTCGCTAGATTTCGAGCTTGTTTC<br>T-OTU3_06: GTACTTCTCCCTTTCCTTGGGGTCATTG<br>T-DNA junction<br>T-OTU3_03: GGCTTCGCTAGATTTCGAGCTTGTTTC<br>pROK2_LBa1: TGATGGTTCACGTAGTGGGCCATCGCCCTG         |
| <i>otu5-1</i>                                                                       | Wild-type<br>T_OTU5_5': GGGGGTTTGGTCTTGTTTCTAGAGTTG<br>T_OTU5_3': CCAGCTATAGCTCTAACTAGAGTGTCG<br>T-DNA junction<br>pROK2_LBa1: TGATGGTTCACGTAGTGGGCCATCGCCCTG<br>T_OTU5_3': CCAGCTATAGCTCTAACTAGAGTGTCG          |
| <i>otld1-1</i>                                                                      | Wild-type<br>T_OTU6_5endA: GGACTTGGATTTAGTAGCCTTAGTGGG<br>T_OTU6_3endA: TGCTGGTTTCGAATCGCTGCCTGAAGG<br>T-DNA junction<br>T_OTU6_5endA: GGACTTGGATTTAGTAGCCTTAGTGGG<br>pROK2_LBa1: TGATGGTTCACGTAGTGGGCCATCGCCCTG |
| <i>otu7-1</i>                                                                       | Wild-type<br>T-OTU7_03: AACACTACAACAGTGTGCGTTCCAAGG<br>T-OTU7_04: TATCATCGGTCTGTGTAGTGCCTTGG<br>T-DNA junction<br>T-OTU7_03: AACACTACAACAGTGTGCGTTCCAAGG<br>pROK2_LBa1: TGATGGTTCACGTAGTGGGCCATCGCCCTG           |
| <i>otu10-1</i>                                                                      | Wild-type<br>184G03_5' : GGAGAAATACCTCCGGAAGAAGAAG<br>184G03_3' : ATGGAAGCTAGCAAAGATTCTCAA                                                                                                                       |

|                |                                                                                                                                                                                                                        |
|----------------|------------------------------------------------------------------------------------------------------------------------------------------------------------------------------------------------------------------------|
|                | T-DNA junction<br>184G03_3' : ATGGAAGCTAGCAAAGATTCTCAA<br>GABI_LB: CCCATTTGGACGTGAATGTAGACAC,<br>GABI_LB4: CACGGATGATCTCGCGGAGGGTAG                                                                                    |
| <i>otu12-1</i> | Wild-type<br>T_OTU12_5endB: GAATGGGGAGACCATATTACCCTACAAG<br>T_OTU12_3endB: CTCTTTGGCTTATGCTGAACTGGAGCAG<br>T-DNA junction<br>pROK2_LBa1: TGATGGTTCACGTAGTGGGCCATCGCCCTG<br>T_OTU12_3endB: CTCTTTGGCTTATGCTGAACTGGAGCAG |
| <i>fld-6</i>   | Wild-type<br>fld6-F: TCTCCCTTGGGGCAGCACTCGAGAC<br>fld6-R: CATCGCCTGAAGCTCCCACTGCAAC<br>T-DNA junction:<br>fld6-F: TCTCCCTTGGGGCAGCACTCGAGAC<br>LB3: TAGCATCTGAATTTTCATAACCAATCTCGATACAC                                |
| <i>arp6-1</i>  | Wild-type<br>ARP6-1-S: GTTCTTCCTGATGGTGTACACATA<br>ARP6-1-A: GGCATGAGTTTATAGCTCGGACAAT<br>T-DNA junction:<br>LB3: TAGCATCTGAATTTTCATAACCAATCTCGATACAC<br>ARP6-1-A: GGCATGAGTTTATAGCTCGGACAAT                           |
| <i>hub1-4</i>  | Wild-type<br>HUB1-2 RP: AGCTCCGACAAGAACTCAGTG<br>HUB1-2 LP TGGGAAAACATGGTATTGAGG<br>T-DNA junction:<br>HUB1-2 RP: AGCTCCGACAAGAACTCAGTG<br>pROK2_LBa1: TGATGGTTCACGTAGTGGGCCATCGCCCTG                                  |
| <i>hub1-5</i>  | Wild-type<br>HUB1-1 LP: TTTTCTGTTTCAGGGATGTCG<br>RP-1: GAGAGACCGAAGACGAGAAACTTTC<br>T-DNA junction:<br>pROK2_LBa1: TGATGGTTCACGTAGTGGGCCATCGCCCTG<br>RP-1: GAGAGACCGAAGACGAGAAACTTTC                                   |
| <b>RT-PCR</b>  |                                                                                                                                                                                                                        |
| <i>FVE</i>     | FVE01: AAGATTCTCAGACGCCGTCGTCTC<br>FVE02: ACGGTTTGGTTGGGTTTCAACATC                                                                                                                                                     |
| <i>FLD</i>     | FLD01: GAGCACAGATCTCGATACCTTTGG<br>FLD02: TCGTAATCATCGCCTGAAGCTCCC                                                                                                                                                     |
| <i>FPA</i>     | FPA01: TGTTAGCGAGCCTCTCAGAATACC<br>FPA02: GAAACAGGATGATTTGACGAACCC                                                                                                                                                     |
| <i>FCA</i>     | FCA01: CCCGTTAGGTGGTTATGGTGTTC<br>FCA02: AGCGGTTGCTGCTGGGAACGAGGG                                                                                                                                                      |

|                     |                                                                               |
|---------------------|-------------------------------------------------------------------------------|
| <b><i>LD</i></b>    | LD01: TCTTGTTTATGCACTAACTTCGGG<br>LD02: CTGGTTCCTAACTGCATACGAG                |
| <b><i>FY</i></b>    | FY01: AGCAGCAAGGGTATCAGCAACAAC<br>FY02: CATCTGTGGACGGTTGAAACCACC              |
| <b><i>FLC</i></b>   | FLC-01: GCTTCTCCTCCGGCGATAACCTGG<br>FLC-02: TGTCGGAGATTTGTCCAGCAGGTG          |
| <b><i>MAF1</i></b>  | MAF1-01: TGATGATGGAGTATATCGAGTCCC<br>MAF1-02: AATCCAATCCGTACATTCAGACAC        |
| <b><i>MAF2</i></b>  | MAF2-01: TAATGATGGGGGAAGTGAAGTCCC<br>MAF2-02: CTGTAAGTTTAAGGTGAAAGCTCAGCC     |
| <b><i>MAF3</i></b>  | MAF3-01: TAATGATGGAGGATATGAAGTCAC<br>MAF3-02: GAACTCTGATATTTGTCTACTAAGGTAC    |
| <b><i>MAF4</i></b>  | MAF4-01: GCTGCTGAGAGAGGAGAACCAGAG<br>MAF4-02: TGGATGACTTTTCCGTAGCAGGGGGAAG    |
| <b><i>MAF5</i></b>  | MAF5-01: AGTTGCTGAAAGAAAAGAACAAGGT<br>MAF5-02: TCCTGTCTTCCAAGGTAACACAAAGG     |
| <b><i>CO</i></b>    | CO01: GAGTATGGACTACAAATTCACAGG<br>CO02: GGTCAGGTTGTTGCTCTACTGTCC              |
| <b><i>SOC1</i></b>  | SOC1-01: CATAGATCGTTATCTGAGGCATAC<br>SOC1-02: CTTTCTTGAAGAACAAGGTAACCC        |
| <b><i>FT</i></b>    | FT-01: AGACGTTCTTGATCCGTTTAATAGATC<br>FT-02: CACTGTTTGCTGCCAAGCTGTCG          |
| <b><i>UBQ10</i></b> | UBQ10-5': GTGGTGGTTTCTAAATCTCGTCTCTG<br>UBQ10-3': GAAGAAGTTCGACTTGTCATTAGAAAG |

#### Verification of flowering mutants

|                       |                                                                                                                                                                                           |
|-----------------------|-------------------------------------------------------------------------------------------------------------------------------------------------------------------------------------------|
| <b><i>FRIGIDA</i></b> | FRI-SF2_f: AGATTTGCTGGATTTGATAAGG<br>FRI-SF2_r: GAAATTCACCGAGTGAGAACAGA<br>(Wild-type and mutant <i>FRI</i> were distinguished by the size differences of <i>RsaI</i> -digested fragment) |
| <b><i>ld-1</i></b>    | ld1-F: ACCTCTCCACAAAGCATCTCCTGA<br>ld1-R: GCAACAGTTTGGACCCTGTGACGA<br>(primers designed to differentiate a G to T mutation at the 5' splicing donor site of intron 8 in <i>ld-1</i> )     |
| <b><i>fve-4</i></b>   | FVE4-F: ACCGACAGTCCTGATGTGAGTGCTG<br>FVE4-R: GGTTCCGTTGGGCACATGGCAAGAG<br>(primers designed to differentiate a G to A mutation at 11 <sup>th</sup> residue of exon 6 in <i>fve-4</i> )    |

#### Complementation, overexpression and transient expression constructs including intermediates

|                                |                                                                                                                                                        |
|--------------------------------|--------------------------------------------------------------------------------------------------------------------------------------------------------|
| <b>pET28a-<br/>OTU5a-C192S</b> | OTU5a-C192S-T: GATTAAACCAGACGGACATAGCCTTTACCGTGCTGTTG<br>OTU5a-C192S-B: CAACAGCACGGTAAAGGCTATGTCCGTCTGGTTTAATC<br>(site-mutagenized from pET28a-OTU5a) |
| <b>pENTR221-<br/>OTU5a_C</b>   | OTU5a_CF:<br>GGGGACAAGTTTGTACAAAAAAGCAGGCTTCATGGCAGACAATAAAACATCTGAAG<br>OTU5a_CR:<br>GGGGACCACTTTGTACAAGAAAGCTGGGTATCATCCGGTGATGTTGTTGACGAGCAC        |

|                               |                                                                                                                                                                                              |
|-------------------------------|----------------------------------------------------------------------------------------------------------------------------------------------------------------------------------------------|
|                               | (The bold-face letters are attB1 and attB2 sites and the underlined are 5' and 3' OTU5-specific sequence; template pET28a-OTU5a)                                                             |
| <b>pENTR221-OTU5a-C192S_C</b> | OTU5a_CF:<br>GGGGACAAGTTTGTACAAAAAAGCAGGCTTCATGGCAGACAATAAAACATCTGAAG<br>OTU5a_CR:<br>GGGGACCACTTTGTACAAAGAAAGCTGGGTATCATCCGGTGATGTTGTTGACGAGCAC<br>(template pET28a-OTU5a-C192S)            |
| <b>OTU5a-eGFP</b>             | OTU5a-X: TCCCCCGGGATGGCAGACAATAAAACATCTGAAG<br>OTU5-E: CATGAATTCTCCGGTGATGTTGTTGACGAGCAC<br>(Amplified fragment was cloned into p2X35S-TEV-eGFP-35ST to express OTU5a-eGFP, see methods)     |
| <b>OTU5b-eGFP</b>             | OTU5b-X: TCCCCCGGGATGGATGCTTCTCAGGAGCAAC<br>OTU5-E: CATGAATTCTCCGGTGATGTTGTTGACGAGCAC<br>(Amplified fragment was cloned into p2X35S-TEV-eGFP-35ST to express OTU5b-eGFP, see methods)        |
| <b>eGFP-OTU5a</b>             | OTU5a-B: TCCGGATCC ATGGCAGACAATAAAACATCTGAAG<br>OTU5-S: CATGTCGACTCATCCGGTGATGTTGTTGACGAGCAC<br>(Amplified fragment was cloned into p2X35S-TEV-eGFP-35ST to express eGFP-OTU5a, see methods) |
| <b>eGFP-OTU5b</b>             | OTU5b-B: TCCGGATCCATGGATGCTTCTCAGGAGCAAC<br>OTU5-S: CATGTCGACTCATCCGGTGATGTTGTTGACGAGCAC<br>(Amplified fragment was cloned into p2X35S-TEV-eGFP-35ST to express eGFP-OTU5b, see methods)     |
| <b>RT-qPCR</b>                |                                                                                                                                                                                              |
| <b>UBQ10</b>                  | F: GTGGTGGTTTCTAAATCTCGTCTCTG<br>R: GAAGAAGTTCGACTTGTCATTAGAAAG                                                                                                                              |
| <b>FLC</b>                    | F: CCGAACTCATGTTGAAGCTTGTTGAG<br>R: CGGAGATTTGTCCAGCAGGTG                                                                                                                                    |
| <b>MAF1</b>                   | F: ACGTTGCTGGCAACAGATGA<br>R: AATTGAGCAGCGGGAGAGTC                                                                                                                                           |
| <b>MAF2</b>                   | F: ATGGCTCCGGCAACAAAGTA<br>R: AAGGTGAAAGCTCAGCCGTT                                                                                                                                           |
| <b>MAF3</b>                   | F: AAACACATTTTGGGTCCCCG<br>R: ACCTTTGCGTCGTTTGGAGA                                                                                                                                           |
| <b>MAF4</b>                   | F: TTTCGCACAAGGAGTTGCT<br>R: GCTGCTCTTCCAGGGACTTTA                                                                                                                                           |
| <b>MAF5</b>                   | F: GAAACAGGGGATGAAAGAGCAGTA<br>R: TGGGCTGTGGCCAGAGCTAT                                                                                                                                       |
| <b>CO</b>                     | F: CATTAACCATAACGCATACATTTTCATC<br>R: TCCGGCACAACACCAGTT                                                                                                                                     |
| <b>SOC1</b>                   | F: ATCGAGTCAGCACCAAACCG<br>R: AGCTGTTGCTCAATCTGTTGC                                                                                                                                          |
| <b>FT</b>                     | F: ATCTCCATTGGTTGGTGACTGATA                                                                                                                                                                  |

|                      |                                                                 |
|----------------------|-----------------------------------------------------------------|
|                      | R: GCCAAAGGTTGTTCCAGTTGTAG                                      |
| <b><i>FVE</i></b>    | F: ATGGCGGATGAGTGA<br>R: ACTCTTAAGGCTTGGAGGCAC                  |
| <b><i>FLD</i></b>    | F: TTAAAGCCGAGCGAACTGGT<br>R: GCGGCAACGGTCCTTTAATC              |
| <b><i>FPA</i></b>    | F: AGGCCCCTCAGAGGTACAAA<br>R: CTTGTGCAGGAGATGGGAGG              |
| <b><i>FCA</i></b>    | F: GCTCGGACACATATACCCGT<br>R: GCTCCTCGTCTCATGTACCTC             |
| <b><i>LD</i></b>     | F: CGGTTTGCGTATTGGTCTTCG<br>R: ACGACGACATCTTGGAGCTG             |
| <b><i>FY</i></b>     | F: CGCACTGTCTGCGGGATAAA<br>R: TGCATATTGGAACAGAACAAAAACC         |
| <b>ChIP-qPCR</b>     |                                                                 |
| <b><i>FLC1</i></b>   | F: ATTTAGCAACGAAAGTGAAAATAAGG<br>R: GCCACGTGTACCGCATGAC         |
| <b><i>FLC2</i></b>   | F: AGAAATCAAGCGAATTGAGAACAA<br>R: CGTTGCGACGTTTGGAGAA           |
| <b><i>FLC3</i></b>   | F: AATTGCATGTCATTACGATTTG<br>R: TGAAACTTCACTCAACAACATCGA        |
| <b><i>FLC4</i></b>   | F: TTATCGCCCTTAATCTTATCATCGT<br>R: AAGATTGAGGTTGTGGATTGTCAA     |
| <b><i>FLC5</i></b>   | F: CCGCCACATCATCATTATCATC<br>R: ACAAGGTTTTTTCCAGCGATAGA         |
| <b><i>FLC6</i></b>   | F: AAGCCAGCGCTATCACTAACTTT<br>R: TCGGCAGATTGAAAATGACATT         |
| <b><i>FLC7</i></b>   | F: CATCTCTCCAGCCTGGTCAAG<br>R: GGCTTTAAGATCATCAGCATGCT          |
| <b><i>FLC8</i></b>   | F: AGCCAGGTAACGAAAGCTACATTT<br>R: ACATGGACATTGGACACACAACA       |
| <b><i>FLC9</i></b>   | F: CATCATGTGGGAGCAGAAGCT<br>R: CGGAAGATTGTCGGAGATTTG            |
| <b><i>FLC10</i></b>  | F: CGTATGGTTGGCATGGGT TT<br>R: ACTAAGCTTATTGGGCCGAATG           |
| <b><i>MAF4-1</i></b> | F: AAAAGTACGGATTGGATTCAAAAGA<br>R: GGAAAACCAAAGGAATTAAGAAGCT    |
| <b><i>MAF4-2</i></b> | F: GACCAACGCGCCACAAG<br>R: CGGTGCGTTTTTAATAGGAGTTTAG            |
| <b><i>MAF4-3</i></b> | F: TGGTGTCCAAAGTCCAGAGATG<br>R: CCTTGCAACAAATGAAAACAATAGA       |
| <b><i>MAF4-4</i></b> | F: CCGAATTGAGACCTTGTAGAAGTAGA<br>R: ATCAAGCATTTGTGGTGTTAAGTATGA |
| <b><i>MAF4-5</i></b> | F: GTTGTTTTCTTTTCTGTTGTTTATCTATG                                |

|                      |                                                                 |
|----------------------|-----------------------------------------------------------------|
|                      | R: ATACTTACATTATCGCTTTTCGCTTCT                                  |
| <b><i>MAF4-6</i></b> | F: GCGGAAAGCCGGTAAAAGAC<br>R: CGAATCTGGGCTTAACAGTAACAGT         |
| <b><i>MAF5-1</i></b> | F: CTTTTTCTCACTGTTTTGTCTTTATTCAGT<br>R: CCCTGAGGGCGCGTTTAT      |
| <b><i>MAF5-2</i></b> | F: TGGTGGCGGAAGATGTACTCT<br>R: TCCCTGCAACAAATTGAAACAA           |
| <b><i>MAF5-3</i></b> | F: AATTTGGCTTATTCTGTGAGTGCTT<br>R: TTCAGAAAGTTGGTGAAATCATATTGAC |
| <b><i>MAF5-4</i></b> | F: CGGATCTTGCCTGACTTTGG<br>R: GCAACAAGACATTGAGGATTG TG          |
| <b><i>MAF5-5</i></b> | F: TTTGCGGCCCATTTAGAGAT<br>R: TCCGAGGAGACAACCAGTGTT             |
| <b><i>Actin2</i></b> | F: GATGAGGCAGGTCCAGGAATC<br>R: AACCCCAGCTTTTTAAGCCTTT           |
