# Supplementary material for: The Arabidopsis Deubiquitylase OTU5 Suppresses Flowering by Histone Modification-Mediated Activation of the Major Flowering Repressors FLC, MAF4, and MAF5
Source: MDPI journal article supplement (doi:10.3390/ijms24076176), 2023-03-24
Supplement: s1 [file s1]

**Table S2.** The differentially expressed genes in *otu5-1*.

|                                   | Probe                                       | Locus <sup>a</sup>     | Fold                 | Description                                                                                                                                                                                 | GO categories <sup>b</sup> |
|-----------------------------------|---------------------------------------------|------------------------|----------------------|---------------------------------------------------------------------------------------------------------------------------------------------------------------------------------------------|----------------------------|
| <b><i>Downregulated genes</i></b> |                                             |                        |                      |                                                                                                                                                                                             |                            |
| 1                                 | A_84_P11480                                 | AT1G53480              | -22.5                | MRD1 ( <i>mtol</i> RESPONDING DOWN 1).                                                                                                                                                      |                            |
| 2                                 | A_84_P24164                                 | AT3G62940              | -18.9                | OTU5.                                                                                                                                                                                       |                            |
| 3                                 | A_84_P761415                                | AT3G42658              | -5.9                 | Member of Sadhu non-coding retrotransposon family. In some natural accessions the allele is methylated and silenced.                                                                        |                            |
| 4                                 | A_84_P751526                                | AT1G72920              | -5.6                 | Putative disease resistance protein (Toll-Interleukin-Resistance-NBS class).                                                                                                                | P3/P4                      |
| 5                                 | A_84_P156615                                | AT4G12490              | -5.2                 | Bifunctional trypsin- $\alpha$ amylase inhibitor/lipid-transfer protein (LTP)/seed storage 2S albumin superfamily protein.                                                                  | P2/P4/P10/F2               |
| 6                                 | A_84_P785348<br>A_84_P296724                | AT5G51190              | -4.8<br>-4.2         | A member of the ERF (ethylene response factor) subfamily B-3 of ERF/AP2 transcription factor family.                                                                                        | P1/F5/C5                   |
| 7                                 | A_84_P550153                                | AT3G30720              | -4.3                 | QUA-QUINE STARCH.                                                                                                                                                                           |                            |
| 8                                 | A_84_P545044                                | AT5G03090              | -4.2                 | Unknown protein.                                                                                                                                                                            |                            |
| 9                                 | A_84_P19516                                 | AT4G25470              | -3.9                 | Encodes a member of the DREB subfamily A-1 of ERF/AP2 transcription factor family (CBF2/C-REPEAT/DRE BINDING FACTOR 2).                                                                     | P5/P9/F5/F8/C5             |
| 10                                | A_84_P17343                                 | AT2G44840              | -3.8                 | A member of the ERF (ETHYLENE RESPONSE FACTOR) subfamily B-3 of ERF/AP2 transcription factor family.                                                                                        | P1/F5/C5                   |
| 11                                | A_84_P788437<br>A_84_P171073                | AT1G35210<br>AT1G35210 | -3.8<br>-3.2         | Unknown protein with an unknown function DUF740 (InterPro:IPR008004) domain.                                                                                                                |                            |
| 12                                | A_84_P784210<br>A_84_P10170<br>A_84_P784401 | AT5G10140              | -3.5<br>-3.4<br>-3.0 | MADS-box protein encoded by FLOWERING LOCUS C - transcription factor that functions as a repressor of floral transition and contributes to temperature compensation of the circadian clock. | P5/P6/P8/F5/F6             |
| 13                                | A_84_P504929<br>A_84_P834641                | AT3G29000              | -3.5<br>-3.1         | Calcium-binding EF-hand family protein.                                                                                                                                                     |                            |
| 14                                | A_84_P15331                                 | AT2G43620              | -3.5                 | Chitinase family protein.                                                                                                                                                                   | C3                         |
| 15                                | A_84_P103016                                | AT4G12500              | -3.4                 | Bifunctional inhibitor/lipid-transfer protein/seed storage 2S albumin superfamily protein.                                                                                                  | P10/F2                     |
| 16                                | A_84_P21874                                 | AT1G27730              | -3.3                 | SALT TOLERANCE ZINC FINGER (STZ), related to Cys2/His2-type zinc-finger proteins found in higher plants.                                                                                    | P1/P3/P5/P7/P15/F5/F6/C5   |
| 17                                | A_84_P13916                                 | AT4G36430              | -3.1                 | Peroxidase superfamily protein.                                                                                                                                                             | F1/F12/C2                  |
| 18                                | A_84_P21841<br>A_84_P812454                 | AT1G02930              | -3.1<br>-2.5         | ATGSTF6, encodes glutathione transferase belonging to the phi class of GSTs.                                                                                                                | P4/P7/P15/F4/C2            |
| 19                                | A_84_P20180                                 | AT2G32030              | -3.0                 | GCN5-related Acyl-CoA N-acyltransferases (NAT) superfamily protein.                                                                                                                         |                            |
| 20                                | A_84_P97916                                 | AT4G29780              | -2.9                 | Unknown protein.                                                                                                                                                                            |                            |
| 21                                | A_84_P15931                                 | AT5G47230              | -2.9                 | ERF5, encodes a member of the ERF (ETHYLENE RESPONSE FACTOR) subfamily B-3 of ERF/AP2 transcription factor family.                                                                          | P1/P5/F5/F8/C5             |

Supplemental Data. Radjacommare et al.

|    |                                              |                        |                      |                                                                                                                                                                                                                                     |                           |
|----|----------------------------------------------|------------------------|----------------------|-------------------------------------------------------------------------------------------------------------------------------------------------------------------------------------------------------------------------------------|---------------------------|
| 22 | A_84_P809041<br>A_84_P21047                  | AT2G38530              | -2.9<br>-2.6         | LTP2, belongs to a family of lipid transfer proteins, involved in lipid transfer between membranes. Similar to other Arabidopsis <i>LPT</i> genes but highest similarity to LPT1.                                                   | P10/P11/F2                |
| 23 | A_84_P21109<br>A_84_P807916                  | AT2G38390              | -2.9<br>-2.5         | Peroxidase superfamily protein.                                                                                                                                                                                                     | P7/F1/F12                 |
| 24 | A_84_P808228<br>A_84_P18366                  | AT3G20470              | -2.7<br>-2.7         | GLYCINE-RICH PROTEIN 5 (GRP5), encodes a glycine-rich protein that is expressed more abundantly in immature seed pods than in stems and leaves.                                                                                     | C2                        |
| 25 | A_84_P786490                                 | AT2G46400              | -2.7                 | WRKY DNA-BINDING PROTEIN 46, member of WRKY Transcription Factor; Group III.                                                                                                                                                        | P1/F5/C5                  |
| 26 | A_84_P10415                                  | AT1G52030              | -2.7                 | MYROSINASE-BINDING PROTEIN 2 (MBP2), may be involved in metabolizing glucosinolates and forming defense compounds to protect against herbivory. Also similar to lectins and other agglutinating factors. Expressed only in flowers. | P3/P4/P6/F10/C4           |
| 27 | A_84_P16923                                  | AT5G59820              | -2.7                 | RESPONSIVE TO HIGH LIGHT 41 (RHL41), Encodes a zinc finger protein involved in high light and cold acclimation.                                                                                                                     | P1/P3/P5/P7/P9/P12/P15/F5 |
| 28 | A_84_P16942                                  | AT5G64120              | -2.6                 | Encodes a cell wall bound peroxidase that is induced by hypo-osmolarity.                                                                                                                                                            | P2/P4/F1/C2/C3            |
| 29 | A_84_P11274<br>A_84_P825221                  | AT5G65080              | -2.6<br>-2.6         | MADS AFFECTING FLOWERING 5 (AGL68/MAF5), upregulated during vernalization and regulates flowering time.                                                                                                                             | P5/P6/P8/F5/C5            |
| 30 | A_84_P16848                                  | AT5G39580              | -2.6                 | Peroxidase superfamily protein.                                                                                                                                                                                                     | P2/P4/F1/F12              |
| 31 | A_84_P271180                                 | AT1G53490              | -2.5                 | RING/U-box superfamily protein. Overlapped with AT1G53480.                                                                                                                                                                          |                           |
| 32 | A_84_P91639                                  | AT2G39030              | -2.5                 | Acyl-CoA N-acyltransferases (NAT) superfamily protein.                                                                                                                                                                              |                           |
| 33 | A_84_P19239                                  | AT1G44830              | -2.5                 | Encodes a member of the DREB subfamily A-5 of ERF/AP2 transcription factor family. The protein contains one AP2 domain. There are 15 members in this subfamily, including RAP2.1, RAP2.9 and RAP2.10.                               | F5/C5                     |
| 34 | A_84_P842527                                 | AT5G42800              | -2.5                 | DIHYDROFLAVONOL 4-REDUCTASE, catalyzes the conversion of dihydroquercetin to leucocyanidin in the biosynthesis of anthocyanins.                                                                                                     | F9                        |
| 35 | A_84_P199304                                 | AT1G19610              | -2.5                 | LOW-MOLECULAR-WEIGHT CYSTEINE-RICH 78 (LCR78), PDF1.4, encode a PR (pathogenesis-related) protein. Belongs to the plant defensin (PDF) family.                                                                                      | P4                        |
| 36 | A_84_P21958                                  | AT2G43520              | -2.5                 | TRYPSIN INHIBITOR PROTEIN 1 (ATTI1), member of the defensin-like (DEFL) family. Encodes putative trypsin inhibitor protein, which may function in defense against herbivory.                                                        | P4/C3                     |
| 37 | A_84_P12264                                  | AT5G58310              | -2.4                 | METHYL ESTERASE 18 (MES18), encodes a protein shown to have methyl IAA esterase activity in vitro.                                                                                                                                  |                           |
| 38 | A_84_P553370                                 | AT1G56240<br>AT1G56242 | -2.4                 | PHLOEM PROTEIN 2-B13 (AtPP2-B13), F-box domain. Potential natural antisense gene, locus overlaps with AT1G56240.                                                                                                                    |                           |
| 39 | A_84_P18533                                  | AT4G12470              | -2.4                 | AZELAIC ACID INDUCED 1, involved in the priming of salicylic acid induction and systemic immunity triggered by pathogen or azelaic acid. AT4G12490 (#5) and AT4G12500 (#15) also induced.                                           | P2/P4/P10/F2              |
| 40 | A_84_P602187                                 | AT1G05575              | -2.4                 | Unknown protein, anaerobic respiration.                                                                                                                                                                                             |                           |
| 41 | A_84_P854289<br>A_84_P216738<br>A_84_P805783 | AT2G05380              | -2.3<br>-2.2<br>-2.0 | GLYCINE-RICH PROTEIN 3 SHORT ISOFORM (GRP3S).                                                                                                                                                                                       |                           |
| 42 | A_84_P21275                                  | AT3G50930              | -2.3                 | Cytochrome BC1 synthesis (BCS1), AAA-type ATPase, nucleoside-triphosphatase activity.                                                                                                                                               |                           |

Supplemental Data. Radjacommmare et al.

|    |                                             |                                     |                      |                                                                                                                                                                                                                                                                                                                                                                                                                      |                |
|----|---------------------------------------------|-------------------------------------|----------------------|----------------------------------------------------------------------------------------------------------------------------------------------------------------------------------------------------------------------------------------------------------------------------------------------------------------------------------------------------------------------------------------------------------------------|----------------|
| 43 | A_84_P159845                                | AT3G28290<br>AT3G28300              | -2.3                 | AT14A, possesses a transmembrane domain and a small region that has sequence similarities to integrins from fungi, insects, and humans. It is localized to plasma membrane and cytoplasm.                                                                                                                                                                                                                            | C6             |
| 44 | A_84_P15416                                 | AT2G36970                           | -2.3                 | UDP-Glycosyltransferase superfamily protein.                                                                                                                                                                                                                                                                                                                                                                         |                |
| 45 | A_84_P813677<br>A_84_P821710                | AT5G66390                           | -2.3<br>-2.0         | Peroxidase superfamily protein.                                                                                                                                                                                                                                                                                                                                                                                      | P15/ F1/F12    |
| 46 | A_84_P22607                                 | AT5G61600                           | -2.2                 | ERF104, encodes a member of the ERF (ETHYLENE RESPONSE FACTOR) subfamily B-3 of ERF/AP2 transcription factor family.                                                                                                                                                                                                                                                                                                 | P2/P4/F5/F8/C5 |
| 47 | A_84_P805655<br>A_84_P19508<br>A_84_P805609 | AT4G23680<br>AT4G23680<br>AT4G23680 | -2.2<br>-2.1<br>-2.1 | Polyketide cyclase/dehydrase and lipid transport superfamily protein.                                                                                                                                                                                                                                                                                                                                                | P4             |
| 48 | A_84_P156125                                | AT3G61190                           | -2.2                 | BON ASSOCIATION PROTEIN 1 (BAP1), encodes a protein with a C2 domain that binds to BON1 in yeast two hybrid analyses. Its ability to bind to phospholipids is enhanced by calcium ions. Involved in maintaining cell homeostasis.                                                                                                                                                                                    | P3/P4/P5/F2    |
| 49 | A_84_P20704                                 | AT5G59320                           | -2.2                 | LIPID TRANSFER PROTEIN 3 (LTP3), encodes a PR (pathogenesis-related) protein. Belongs to the lipid transfer protein (PR-14) family with the following members: At2g38540/LTP1, At2g38530/LTP2, At5g59320/LTP3, At5g59310/LTP4, At3g51600/LTP5, At3g08770/LTP6, At2g15050/LTP7, At2g18370/LTP8, At2g15325/LTP9, At5g01870/LTP10, At4g33355/LTP11, At3g51590/LTP12, At5g44265/LTP13, At5g62065/LTP14, At4g08530/LTP15. | F2/C2/C3       |
| 50 | A_84_P13815                                 | AT4G19030                           | -2.2                 | NOD26-LIKE MAJOR INTRINSIC PROTEIN 1 (NLM1/NIP1;1), an aquaporin whose expression level is reduced by ABA, NaCl, dark, and dessication. It is expressed at relatively low levels under normal conditions. Also functions in arsenite transport and tolerance.                                                                                                                                                        |                |
| 51 | A_84_P810605                                | AT1G24020                           | -2.1                 | MLP-like protein 423 (MLP423), involved in response to biotic stimulus, defense response.                                                                                                                                                                                                                                                                                                                            | P4             |
| 52 | A_84_P815273                                | AT4G23810                           | -2.1                 | WRKY53, member of WRKY Transcription Factor; Group III.                                                                                                                                                                                                                                                                                                                                                              | P1/P4/F5/F8/C5 |
| 53 | A_84_P223359                                | AT1G54000                           | -2.1                 | GDSL-like Lipase/Acylhydrolase superfamily protein with lipase activity, hydrolase activity, acting on ester bonds, carboxylesterase activity.                                                                                                                                                                                                                                                                       | C2             |
| 54 | A_84_P16072                                 | AT1G65690                           | -2.1                 | Late embryogenesis abundant (LEA) hydroxyproline-rich glycoprotein family, NDR1/HIN1-like 25 (HARPIN-INDUCED PROTEIN-RELATED).                                                                                                                                                                                                                                                                                       |                |
| 55 | A_84_P187524                                | AT2G47010                           | -2.1                 | Unknown protein.                                                                                                                                                                                                                                                                                                                                                                                                     |                |
| 56 | A_84_P161623                                | AT5G50520<br>AT5G50630              | -2.1                 | Major facilitator superfamily protein.                                                                                                                                                                                                                                                                                                                                                                               |                |
| 57 | A_84_P22787                                 | AT1G02920                           | -2.1                 | GLUTATHIONE S-TRANSFERASE 7, GLUTATHIONE S-TRANSFERASE 11                                                                                                                                                                                                                                                                                                                                                            | P2/P4/P7/F4/C5 |
| 58 | A_84_P14142                                 | AT5G09480                           | -2.1                 | Hydroxyproline-rich glycoprotein family protein.                                                                                                                                                                                                                                                                                                                                                                     |                |
| 59 | A_84_P555590                                | AT4G22212                           | -2.1                 | Encodes a defensin-like (DEFL) family protein.                                                                                                                                                                                                                                                                                                                                                                       | P4             |
| 60 | A_84_P10964                                 | AT4G11190                           | -2.1                 | Disease resistance-responsive (dirigent-like protein) family protein, involved in lignin biosynthetic process, defense response.                                                                                                                                                                                                                                                                                     | P4             |
| 61 | A_84_P22055                                 | AT2G38380                           | -2.1                 | Peroxidase superfamily protein.                                                                                                                                                                                                                                                                                                                                                                                      | P7/F1/F12/C2   |
| 62 | A_84_P113182                                | AT4G39670                           | -2.1                 | Glycolipid transfer protein (GLTP) family protein.                                                                                                                                                                                                                                                                                                                                                                   | P10/F2         |
| 63 | A_84_P21578                                 | AT5G39670                           | -2.1                 | Calcium-binding EF-hand family protein.                                                                                                                                                                                                                                                                                                                                                                              |                |

Supplemental Data. Radjacommmare et al.

|                          |                                              |                                                  |                   |                                                                                                                                                                                                                                    |                   |
|--------------------------|----------------------------------------------|--------------------------------------------------|-------------------|------------------------------------------------------------------------------------------------------------------------------------------------------------------------------------------------------------------------------------|-------------------|
| 64                       | A_84_P21763                                  | AT1G61580                                        | -2.1              | RIBOSOMAL PROTEIN 2 (RPL3B), cytosolic large ribosomal subunit.                                                                                                                                                                    |                   |
| 65                       | A_84_P765129                                 | AT3G56210<br>AT4G04223                           | -2.0              | ARM repeat superfamily protein.<br>Other_RNA                                                                                                                                                                                       |                   |
| 66                       | A_84_P15266                                  | AT1G74460                                        | -2.0              | GDSL-like Lipase/Acylhydrolase superfamily protein.                                                                                                                                                                                |                   |
| 67                       | A_84_P17864                                  | AT5G58860                                        | -2.0              | CYTOCHROME P450, FAMILY 86, SUBFAMILY A, POLYPEPTIDE 1 (CYP86A1).                                                                                                                                                                  |                   |
| 68                       | A_84_P857301<br>A_84_P17256                  | AT2G40140                                        | -2.0<br>-2.0      | SALT-INDUCIBLE ZINC FINGER 2 (SZF2), CZF1.                                                                                                                                                                                         | P1/P2/P4/P5/F5    |
| 69                       | A_84_P826434                                 | AT5G43170                                        | -2.0              | ZINC-FINGER PROTEIN 3 (AZF3), The protein is localized to the nucleus and acts as a transcriptional repressor.                                                                                                                     | P1/P5/P7/F5/F6/C5 |
| 70                       | A_84_P14978                                  | AT5G45380                                        | -2.0              | DEGRADATION OF UREA 3 (DUR3) contains InterPro DOMAIN/s: Sodium/solute symporter.                                                                                                                                                  |                   |
| 71                       | A_84_P789165                                 | AT4G20390                                        | -2.0              | Uncharacterized protein family (UPF0497).                                                                                                                                                                                          |                   |
| <b>Upregulated genes</b> |                                              |                                                  |                   |                                                                                                                                                                                                                                    |                   |
| 1                        | A_84_P786320                                 | AT5G35935                                        | 9.7               | Copia-like retrotransposon family.                                                                                                                                                                                                 |                   |
| 2                        | A_84_P832727<br>A_84_P829935<br>A_84_P769957 | ATMG00370<br>ATCG01000<br>ATCG01130<br>AT2G07739 | 5.7<br>4.9<br>4.1 | Ycf1 protein (InterPro:IPR008896), located in endomembrane system.                                                                                                                                                                 |                   |
| 3                        | A_84_P803861<br>A_84_P12125<br>A_84_P869366  | AT5G40340                                        | 4.8<br>4.3<br>3.9 | Tudor/PWWP/MBT superfamily protein.                                                                                                                                                                                                | C5                |
| 4                        | A_84_P14274                                  | AT1G52690                                        | 4.4               | Late embryogenesis abundant protein (LEA) family protein.                                                                                                                                                                          |                   |
| 5                        | A_84_P843857<br>A_84_P610444                 | AT2G22795                                        | 4.2<br>3.6        | Unknown protein.                                                                                                                                                                                                                   |                   |
| 6                        | A_84_P18172                                  | AT2G19970                                        | 3.8               | Cysteine-rich secretory proteins, Antigen 5, and Pathogenesis-related 1 protein (CAP) superfamily protein.                                                                                                                         | C3                |
| 7                        | A_84_P769799                                 | ATCG00800                                        | 3.7               | chrC:124648-124589, encodes a chloroplast ribosomal protein S3, a constituent of the small subunit of the ribosomal complex                                                                                                        | C1                |
| 8                        | A_84_P769282                                 | AT5G40451                                        | 3.7               | Unknown protein.                                                                                                                                                                                                                   |                   |
| 9                        | A_84_P769991                                 | ATCG00820                                        | 3.4               | RIBOSOMAL PROTEIN S19, encodes a 6.8-kDa protein of the small ribosomal subunit.                                                                                                                                                   | C1                |
| 10                       | A_84_P836393<br>A_84_P16682                  | AT4G26190                                        | 3.2<br>2.3        | Haloacid dehalogenase-like hydrolase (HAD) superfamily protein with NLI interacting factor domain (InterPro:IPR004274).                                                                                                            |                   |
| 11                       | A_84_P12130                                  | AT5G41790                                        | 3.1               | COP1-INTERACTIVE PROTEIN 1 (CIP1), encodes a protein that physically interacts specifically with the putative coiled-coil region of COP1 in vitro.                                                                                 | P13               |
| 12                       | A_84_P852628                                 | AT5G02600                                        | 3.1               | SODIUM POTASSIUM ROOT DEFECTIVE 1 (NAKR1), NUCLEAR-ENRICHED PHLOEM COMPANION CELL GENE 6 (NPCC6), heavy metal transport/detoxification superfamily protein.                                                                        | P6/C5             |
| 13                       | A_84_P243495                                 | AT4G15660                                        | 3.0               | Thioredoxin superfamily protein, function in electron carrier activity, arsenate reductase (glutaredoxin) activity, protein disulfide oxidoreductase activity, involved in cell redox homeostasis; located in endomembrane system. | F7                |

Supplemental Data. Radjacommaré et al.

|    |                                                              |                        |                          |                                                                                                                                                                                                                                                                                     |           |
|----|--------------------------------------------------------------|------------------------|--------------------------|-------------------------------------------------------------------------------------------------------------------------------------------------------------------------------------------------------------------------------------------------------------------------------------|-----------|
| 14 | A_84_P810916<br>A_84_P286290<br>A_84_P856546<br>A_84_P810931 | AT5G55660              | 3.0<br>2.4<br>2.3<br>2.2 | DEK domain-containing chromatin-associated protein, GTP binding/RNA binding.                                                                                                                                                                                                        |           |
| 15 | A_84_P853737<br>A_84_P19522                                  | AT4G26630<br>AT4G26630 | 3.0<br>2.2               | DEK domain-containing chromatin-associated protein, GTP binding/RNA binding.                                                                                                                                                                                                        |           |
| 16 | A_84_P20679                                                  | AT5G52280              | 2.9                      | Myosin heavy chain-related protein, protein transport protein-related.                                                                                                                                                                                                              |           |
| 17 | A_84_P16885                                                  | AT5G49360              | 2.9                      | BXL1 (BETA-XYLOSIDASE 1); hydrolase, hydrolyzing O-glycosyl compounds, encodes a bifunctional $\beta$ -D-xylosidase/ $\alpha$ -L-arabinofuranosidase required for pectic arabinan modification.                                                                                     | C2/C3     |
| 18 | A_84_P12986                                                  | AT5G04020              | 2.8                      | Calmodulin-binding protein-related (PICBP).                                                                                                                                                                                                                                         |           |
| 19 | A_84_P18215                                                  | AT2G32290              | 2.7                      | BAM6/BMY5 (BETA-AMYLASE 6).                                                                                                                                                                                                                                                         |           |
| 20 | A_84_P513948                                                 | AT4G27595              | 2.7                      | Unknown protein with Protein of unknown function domain DUF827 (InterPro:IPR008545).                                                                                                                                                                                                |           |
| 21 | A_84_P823879<br>A_84_P16877                                  | AT5G47240<br>AT5G47240 | 2.6<br>2.4               | ATNUDT8 (NUDIX HYDROLASE HOMOLOG 8), hydrolase.                                                                                                                                                                                                                                     | P3        |
| 22 | A_84_P506441                                                 | AT1G75310              | 2.6                      | AUL1 (AUXILIN-LIKE 1 PROTEIN), heat shock protein binding, with heat shock protein DnaJ, N-terminal domain (InterPro:IPR001623).                                                                                                                                                    |           |
| 23 | A_84_P833235<br>A_84_P832416<br>A_84_P16962                  | AT5G16730              | 2.6<br>2.5<br>2.4        | Similar to unknown protein (AT3G02930.1), with protein of unknown function domain DUF827 (InterPro:IPR008545), and spectrin/alpha-actinin domain (InterPro:IPR018159).                                                                                                              |           |
| 24 | A_84_P832185<br>A_84_P566564                                 | AT1G13220<br>AT1G13220 | 2.6<br>2.5               | LITTLE NUCLEI2, encodes a nuclear coiled-coil protein related to the carrot peripheral nuclear protein NMCP1 that is involved in the determination of plant nuclear structure.                                                                                                      | P14/C5    |
| 25 | A_84_P853870<br>A_84_P830874<br>A_84_P565111                 | AT3G05900<br>AT3G05905 | 2.6<br>2.5<br>2.4        | Neurofilament protein-related.<br>Other RNA, potential natural antisense gene, locus overlaps with AT3G05900.                                                                                                                                                                       |           |
| 26 | A_84_P836309<br>A_84_P10237                                  | AT5G41140              | 2.5<br>2.4               | Myosin heavy chain-related protein, contains domain PTHR23160 (PTHR23160).                                                                                                                                                                                                          |           |
| 27 | A_84_P192434                                                 | AT4G36850              | 2.5                      | PQ-loop repeat family protein/transmembrane family protein, contains cystinosin/ERS1p repeat (InterPro:IPR006603).                                                                                                                                                                  |           |
| 28 | A_84_P830699                                                 | AT1G19835              | 2.5                      | Similar to unknown protein <i>A. thaliana</i> AT1G47900.1, <i>Vitis vinifera</i> GB:CAO48232.1, and <i>Oryza sativa</i> GB:EAY89239.1, with unknown function domain DUF869 (InterPro:IPR008587).                                                                                    |           |
| 29 | A_84_P560489                                                 | AT1G63300              | 2.4                      | Myosin heavy chain-related protein, similar to unknown protein <i>A. thaliana</i> AT5G41140.1, <i>V. vinifera</i> GB:CAO17243.1, contains domain PTHR23160 (PTHR23160), Myosin heavy chain-related protein.                                                                         |           |
| 30 | A_84_P825811<br>A_84_P23929                                  | AT2G18700<br>AT2G18700 | 2.4<br>2.4               | TREHALOSE-6-PHOSPHATE SYNTHASE 11 (ATTPS11), encodes an enzyme putatively involved in trehalose biosynthesis. The protein has a trehalose synthase (TPS)-like domain that may or may not be active as well as a trehalose phosphatase (TPP)-like domain.                            |           |
| 31 | A_84_P766211<br>A_84_P841901                                 | AT5G35490<br>AT5G35490 | 2.4<br>2.4               | Encodes MRU1 ( <i>mtol</i> 1 RESPONDING UP). Up-regulated in <i>mtol-1</i> mutant that over-accumulates soluble methionine. A maternally expressed imprinted gene.                                                                                                                  |           |
| 32 | A_84_P13690                                                  | AT3G46370              | 2.4                      | Leucine-rich repeat protein kinase family protein, protein serine/threonine kinase activity, kinase activity, ATP binding; involved in transmembrane receptor protein tyrosine kinase signaling pathway.                                                                            |           |
| 33 | A_84_P14748<br>A_84_P785475                                  | AT1G17420              | 2.4<br>2.2               | LOX3 (LIPOXYGENASE 3), encode a lipoxygenase. lipoxygenases (LOXs) catalyze the oxygenation of fatty acids. Iron ion binding /lipoxygenase/metal ion binding /oxidoreductase, acting on single donors with incorporation of molecular oxygen, incorporation of two atoms of oxygen. | P3/P4/ P6 |

Supplemental Data. Radjacommaré et al.

|    |                              |                        |            |                                                                                                                                                                                                                                                                                                                                                                                                                                                                                                                                |             |
|----|------------------------------|------------------------|------------|--------------------------------------------------------------------------------------------------------------------------------------------------------------------------------------------------------------------------------------------------------------------------------------------------------------------------------------------------------------------------------------------------------------------------------------------------------------------------------------------------------------------------------|-------------|
| 34 | A_84_P262140<br>A_84_P834716 | AT3G19370              | 2.3<br>2.1 | Plant protein of unknown function (DUF869).                                                                                                                                                                                                                                                                                                                                                                                                                                                                                    |             |
| 35 | A_84_P831629                 | AT1G67230              | 2.3        | LITTLE NUCLEI1 (LINC1), encodes a nuclear coiled-coil protein related to the carrot peripheral nuclear protein NMCP1 that is involved in the determination of plant nuclear structure.                                                                                                                                                                                                                                                                                                                                         | P14/C5      |
| 36 | A_84_P76024<br>A_84_P800042  | AT1G17360<br>AT1G17360 | 2.3<br>2.2 | COP1-interacting protein-related (AT1G72410.1).                                                                                                                                                                                                                                                                                                                                                                                                                                                                                |             |
| 37 | A_84_P752982                 | AT1G05320              | 2.3        | Unknown protein with Prefoldin domain (InterPro:IPR009053), best match AT2G32240.1.                                                                                                                                                                                                                                                                                                                                                                                                                                            |             |
| 38 | A_84_P827080                 | AT4G04330              | 2.3        | Chaperonin-like RbcX protein, contains chaperonin-like RbcX domain (InterPro:IPR003435).                                                                                                                                                                                                                                                                                                                                                                                                                                       |             |
| 39 | A_84_P188764                 | AT4G04320<br>AT4G04330 | 2.2        | Malonyl-CoA decarboxylase family protein.<br>Chaperonin-like RbcX protein, contains chaperonin-like RbcX domain (InterPro:IPR003435).                                                                                                                                                                                                                                                                                                                                                                                          | F11         |
| 40 | A_84_P132345<br>A_84_P819992 | AT4G32340              | 2.3<br>2.1 | Tetratricopeptide repeat (TPR)-like superfamily protein.                                                                                                                                                                                                                                                                                                                                                                                                                                                                       |             |
| 41 | A_84_P531612                 | AT4G04745              | 2.3        | Unknown protein, best match AT4G21902.1.                                                                                                                                                                                                                                                                                                                                                                                                                                                                                       |             |
| 42 | A_84_P18110                  | AT1G68790              | 2.2        | LITTLE NUCLEI3 (LINC3).                                                                                                                                                                                                                                                                                                                                                                                                                                                                                                        | C5          |
| 43 | A_84_P19580                  | AT4G14760              | 2.2        | Kinase interacting (KIP1-like) family protein, contains prefoldin (InterPro:IPR009053) and KIP1-like (InterPro:IPR011684) domains.                                                                                                                                                                                                                                                                                                                                                                                             | C5          |
| 44 | A_84_P15826                  | AT5G05600              | 2.2        | 2-oxoglutarate (2OG) and Fe(II)-dependent oxygenase superfamily protein.                                                                                                                                                                                                                                                                                                                                                                                                                                                       |             |
| 45 | A_84_P843872                 | AT1G53430              | 2.2        | Leucine-rich repeat transmembrane protein kinase.                                                                                                                                                                                                                                                                                                                                                                                                                                                                              |             |
| 46 | A_84_P22009                  | AT2G45660              | 2.2        | AGAMOUS-LIKE 20, SUPPRESSOR OF OVEREXPRESSION OF CO 1 (SOC1), controls flowering and is required for CO to promote flowering. It acts downstream of FT. Overexpression of SOC1/AGL20 suppresses not only the late flowering of plants that have functional <i>FRI</i> and <i>FLC</i> alleles but also the delayed phase transitions during the vegetative stages of development. AGL20/SOC1 acts with AGL24 to promote flowering and inflorescence meristem identity. AGL20 upregulates expression of AGL24 in response to GA. | P5/P6/F5/C5 |
| 47 | A_84_P521496                 | AT1G65010              | 2.2        | Unknown protein, putative role in flower development.                                                                                                                                                                                                                                                                                                                                                                                                                                                                          | P6          |
| 48 | A_84_P13560                  | AT2G32150              | 2.2        | Haloacid dehalogenase-like hydrolase (HAD) superfamily protein.                                                                                                                                                                                                                                                                                                                                                                                                                                                                |             |
| 49 | A_84_P503380                 | AT5G08600              | 2.2        | U3 ribonucleoprotein (UTP) family protein, involved in rRNA processing, located in small-subunit processome.                                                                                                                                                                                                                                                                                                                                                                                                                   |             |
| 50 | A_84_P831110<br>A_84_P15196  | AT1G03080              | 2.1<br>2.1 | Kinase interacting (KIP1-like) family protein, contains prefoldin (InterPro:IPR009053) and KIP1-like (InterPro:IPR011684) domains.                                                                                                                                                                                                                                                                                                                                                                                             |             |
| 51 | A_84_P290124                 | AT2G22860              | 2.1        | PHYTOSULFOKINE 2 PRECURSOR (PSK2).                                                                                                                                                                                                                                                                                                                                                                                                                                                                                             | C3          |
| 52 | A_84_P230589                 | AT5G41020              | 2.1        | Myb family transcription factor, contains SANT, DNA-binding (InterPro:IPR001005), homeodomain-like (InterPro:IPR009057), Myb, DNA-binding (InterPro:IPR014778), Myb-like (InterPro:IPR017877), Myb transcription factor (InterPro:IPR015495) domains.                                                                                                                                                                                                                                                                          | F5          |
| 53 | A_84_P23923                  | AT2G37900              | 2.1        | Major facilitator superfamily protein, oligopeptide transport, contains PTR2 family proton/oligopeptide symporter, conserved site (InterPro:IPR018456), oligopeptide transporter (InterPro:IPR000109), major facilitator superfamily, general substrate transporter (InterPro:IPR016196) domains.                                                                                                                                                                                                                              |             |

Supplemental Data. Radjacommaré et al.

|    |                             |                        |            |                                                                                                                                                                                                                                                                                                                                                                                                                                                                                                                                                                                                                                                                                                                                                                                                                                                                         |     |
|----|-----------------------------|------------------------|------------|-------------------------------------------------------------------------------------------------------------------------------------------------------------------------------------------------------------------------------------------------------------------------------------------------------------------------------------------------------------------------------------------------------------------------------------------------------------------------------------------------------------------------------------------------------------------------------------------------------------------------------------------------------------------------------------------------------------------------------------------------------------------------------------------------------------------------------------------------------------------------|-----|
| 54 | A_84_P18414                 | AT1G02610              | 2.1        | RING/FYVE/PHD zinc finger superfamily protein, with protein of unknown function DUF3675 (InterPro:IPR022143), C3HC4 RING-type zinc finger (InterPro:IPR018957), RING-CH-type (InterPro:IPR011016) domain.                                                                                                                                                                                                                                                                                                                                                                                                                                                                                                                                                                                                                                                               |     |
| 55 | A_84_P149018                | AT4G39250              | 2.1        | RADIALIS-LIKE SANT/MYB 2 (RL1, RSM2), contains molecular chaperone, heat shock protein, Hsp40, DnaJ (InterPro:IPR015609), SANT, DNA-binding (InterPro:IPR001005), Myb, DNA-binding (InterPro:IPR014778), homeodomain-like (InterPro:IPR009057), SANT (InterPro:IPR017884) domains.                                                                                                                                                                                                                                                                                                                                                                                                                                                                                                                                                                                      | F5  |
| 56 | A_84_P22385                 | AT4G32350              | 2.1        | Regulator of Vps4 activity in the MVB pathway protein, with protein of unknown function DUF292 domain (InterPro:IPR005061).                                                                                                                                                                                                                                                                                                                                                                                                                                                                                                                                                                                                                                                                                                                                             |     |
| 57 | A_84_P158525                | AT1G15940              | 2.1        | Tudor/PWWP/MBT superfamily protein, contains armadillo-type fold (InterPro:IPR016024).                                                                                                                                                                                                                                                                                                                                                                                                                                                                                                                                                                                                                                                                                                                                                                                  |     |
| 58 | A_84_P846552<br>A_84_P19720 | AT5G48600              | 2.1<br>2.1 | STRUCTURAL MAINTENANCE OF CHROMOSOME 3 (SMC3).                                                                                                                                                                                                                                                                                                                                                                                                                                                                                                                                                                                                                                                                                                                                                                                                                          | C5  |
| 59 | A_84_P127561                | AT4G15680              | 2.0        | Thioredoxin superfamily protein.                                                                                                                                                                                                                                                                                                                                                                                                                                                                                                                                                                                                                                                                                                                                                                                                                                        | F7  |
| 60 | A_84_P15224                 | AT1G16130              | 2.0        | WALL ASSOCIATED KINASE-LIKE 2 (WAKL2).                                                                                                                                                                                                                                                                                                                                                                                                                                                                                                                                                                                                                                                                                                                                                                                                                                  |     |
| 61 | A_84_P15720                 | AT4G22620              | 2.0        | SAUR-like auxin-responsive protein family.                                                                                                                                                                                                                                                                                                                                                                                                                                                                                                                                                                                                                                                                                                                                                                                                                              |     |
| 62 | A_84_P16450                 | AT3G16000              | 2.0        | MAR BINDING FILAMENT-LIKE PROTEIN 1 (MFP1/MSL1.8).                                                                                                                                                                                                                                                                                                                                                                                                                                                                                                                                                                                                                                                                                                                                                                                                                      |     |
| 63 | A_84_P19152                 | AT2G22610              | 2.0        | Di-glucose binding protein, contains kinesin motor (InterPro:IPR019821), malectin/receptor-like protein kinase (InterPro:IPR021720), kinesin (InterPro:IPR001752) domains.                                                                                                                                                                                                                                                                                                                                                                                                                                                                                                                                                                                                                                                                                              |     |
| 64 | A_84_P282520                | AT3G19050              | 2.0        | PHRAGMOPLAST ORIENTING KINESIN 2 (POK2), one of the two <i>A. thaliana</i> homologs isolated in yeast two-hybrid screen for interaction partners of maize gene <i>TANGLED1</i> ( <i>TAN1</i> ). Based on sequence homology in their motor domains, POK1 and POK2 belong to the kinesin-12 class, which also includes the well-characterized group of phragmoplast-associated kinesins AtPAKRPs. Both kinesins are composed of an N-terminal motor domain throughout the entire C terminus and putative cargo binding tail domains. The expression domains for POK2 constructs were broader than those for POK1; both are expressed in tissues enriched for dividing cells. The phenotype of <i>pok1/pok2</i> double mutants strongly resembles that of maize <i>tan1</i> mutants, as characterized by misoriented mitotic cytoskeletal arrays and misplaced cell walls. |     |
| 65 | A_84_P12029                 | AT4G37220              | 2.0        | Cold acclimation protein WCOR413 family, contain cold acclimation WCOR413 domain (InterPro:IPR008892).                                                                                                                                                                                                                                                                                                                                                                                                                                                                                                                                                                                                                                                                                                                                                                  |     |
| 66 | A_84_P855355                | AT5G49740<br>AT5G49730 | 2.0        | FERRIC REDUCTION OXIDASE 7 (FRO7), which encodes a chloroplast ferric chelate reductase. FERRIC REDUCTION OXIDASE 6 (FRO6), which encodes a plasma membrane-located ferric chelate reductase.                                                                                                                                                                                                                                                                                                                                                                                                                                                                                                                                                                                                                                                                           | F3  |
| 67 | A_84_P529724                | AT3G20340              | 2.0        | Unknown protein, expression of the gene is downregulated in the presence of paraquat, an inducer of photooxidative stress.                                                                                                                                                                                                                                                                                                                                                                                                                                                                                                                                                                                                                                                                                                                                              | P15 |

<sup>a</sup>The yellow- and pink-color highlighted loci are those associated with the enriched Gene Ontology (GO) terms ( $p < 10E-03$ ), in which the pink-color highlighted are those involved in flower development.

<sup>b</sup>The GO terms are categorized as related to specific biological processes (P1-P15), biochemical activities/molecular functions (F1-F12), and cellular and complex components (C1-C6); see Table S3 for the specific term names.
