# Supplementary material for: The Arabidopsis Deubiquitylase OTU5 Suppresses Flowering by Histone Modification-Mediated Activation of the Major Flowering Repressors FLC, MAF4, and MAF5
Source: MDPI journal article supplement (doi:10.3390/ijms24076176), 2023-03-24
Supplement: s1 [file s1]

**Table S1.** The characterized *A. thaliana* T-DNA insertion lines for genes encoding OTU deubiquitinases.

| T-DNA line     | Locus     | Stock name <sup>a</sup> | Insertion site                                                                                    | RNA/protein expression <sup>b</sup> |
|----------------|-----------|-------------------------|---------------------------------------------------------------------------------------------------|-------------------------------------|
| <i>otu1-1</i>  | At1g28120 | Salk_058652             | Intron 3, 6 bp upstream of exon 4                                                                 | KD/KO                               |
| <i>otu2-1</i>  | At1g50670 | Salk_089249             | Intron 2, 16 bp upstream of exon 3                                                                | KO/KO                               |
| <i>otu3-1</i>  | At2g38025 | Salk_019314             | Intron 3, 8 bp downstream of exon 3                                                               | KO/ND                               |
| <i>otu5-1</i>  | At3g62940 | Salk_032407             | Exon 2, 23 bp downstream of <i>OTU5a</i> start codon (22 bp upstream of <i>OTU5b</i> start codon) | KO/KO                               |
| <i>otld1-1</i> | At2g27350 | Salk_028707             | Exon 8, 34 bp upstream of 3' exon junction                                                        | KO/ND                               |
| <i>otu7-1</i>  | At5g67170 | Salk_032746             | Exon 7, 31 bp upstream of intron 7                                                                | KO/ND                               |
| <i>otu10-1</i> | At5g03330 | GABI-Kat 184G03         | Intron 4, 1 bp upstream of exon 5                                                                 | KO/ND                               |
| <i>otu12-1</i> | At3g02070 | Sslk_129340             | Intron 7, 45 bp downstream of exon 7                                                              | KD/ND                               |

<sup>a</sup>SALK and GABI-Kat lines were requested from the Arabidopsis Biological Resource Center at Ohio State University (Columbus, OH, USA) and the European Arabidopsis Stock Center at the University of Nottingham (Loughborough, UK), respectively.

<sup>b</sup>KD, knock-down determined by RT-PCR; KO, knock-out determined by RT-PCR or immunoblotting; ND, not determined.
