# Supplementary material for: The Arabidopsis Deubiquitylase OTU5 Suppresses Flowering by Histone Modification-Mediated Activation of the Major Flowering Repressors FLC, MAF4, and MAF5
Source: MDPI journal article supplement (doi:10.3390/ijms24076176), 2023-03-24
Supplement: s1 [file s1]

**Table S3.** The enriched GO terms for differentially expressed genes in *otu5-1*.

| Cat <sup>a</sup>                     | Term Name                  | GOID    | Depth | Reference <sup>b</sup> | Count (gene list) <sup>c</sup>                                                                                                                                                                                         | Fsh <sup>d</sup> | elim <sup>e</sup> |
|--------------------------------------|----------------------------|---------|-------|------------------------|------------------------------------------------------------------------------------------------------------------------------------------------------------------------------------------------------------------------|------------------|-------------------|
| <i>Specific biological processes</i> |                            |         |       |                        |                                                                                                                                                                                                                        |                  |                   |
| P1                                   | Response to chitin         | 0010200 | 6     | 127                    | 9 (At1G27730/At2G40140/At2G44840/<br>At2G46400/At4G23810/At5G43170/At5G47230/<br>At5G51190/At5G59820)                                                                                                                  | 5.24E-09         | 5.24E-09          |
| P2                                   | Defense response to fungus | 0050832 | 5     | 132                    | 7 (At1G02920/At2G40140/At4G12470/At4G12490/<br>At5G39580/At5G61600/At5G64120)                                                                                                                                          | 1.98E-06         | 1.98E-06          |
| P3                                   | Response to wounding       | 0009611 | 4     | 153                    | 7 (At1G17420/At1G27730/At1G52030/At1G72920/<br>At3G61190/At5G47240/At5G59820)                                                                                                                                          | 5.28E-06         | 5.28E-06          |
| P4                                   | Defense response           | 0006952 | 4     | 796                    | 19 (At1G02920/At1G02930/At1G17420/<br>At1G19610/At1G24020/<br>At1G52030/At1G72920/At2G40140/At2G43520/At3<br>G61190/At4G11190/At4G12470/At4G12490/At4G22<br>212/At4G23680/At4G23810/At5G39580/At5G61600<br>/At5G64120) | 2.28E-09         | 3.81E-05          |
| P5                                   | Response to cold           | 0009409 | 4     | 279                    | 10<br>(At1G27730/At2G40140/At2G45660/At3G61190/At<br>4G25470/At5G10140/At5G43170/At5G47230/At5G<br>59820/At5G65080)                                                                                                    | 4.63E-07         | 6.97E-04          |
| P6                                   | Flower development         | 0009908 | 4     | 338                    | 7 (At1G17420/At1G52030/At1G65010/<br>At2G45660/At5G02600/At5G10140/At5G65080)                                                                                                                                          | 7.50E-04         | 7.50E-04          |

|                                                                   |                                           |         |   |      |                                                                              |          |          |
|-------------------------------------------------------------------|-------------------------------------------|---------|---|------|------------------------------------------------------------------------------|----------|----------|
| P7                                                                |                                           |         |   |      | 7<br>(At1G02920/At1G02930/At1G27730/At2G38380/At2G38390/At5G43170/At5G59820) |          |          |
|                                                                   | Response to salt stress                   | 0009651 | 5 | 416  |                                                                              | 0.002451 | 0.002451 |
| P8                                                                | Vernalization response                    | 0010048 | 5 | 17   | 2 (At5G10140/At5G65080)                                                      | 0.002476 | 0.002476 |
| P9                                                                | Cold acclimation                          | 0009631 | 5 | 21   | 2 (At4G25470/At5G59820)                                                      | 0.00378  | 0.00378  |
| P10                                                               |                                           |         |   |      | 5 (At2G38530/At4G12470/At4G12490/At4G12500/At4G39670)                        |          |          |
|                                                                   | Lipid transport                           | 0006869 | 5 | 147  |                                                                              | 4.86E-04 | 0.003951 |
| P11                                                               | Phospholipid transfer to membrane         | 0006649 | 4 | 1    | 1 (At2G38530)                                                                | 0.004375 | 0.004375 |
| P12                                                               | Photosynthetic acclimation                | 0009643 | 7 | 1    | 1 (At5G59820)                                                                | 0.004375 | 0.004375 |
| P13                                                               | Regulation of protein import into nucleus | 0042306 | 5 | 1    | 1 (At5G41790)                                                                | 0.004375 | 0.004375 |
| P14                                                               | Nucleus organization                      | 0006997 | 6 | 28   | 2 (At1G13220/At1G67230)                                                      | 0.006669 | 0.006669 |
| P15                                                               |                                           |         |   |      | 5<br>(At1G02930/At1G27730/At3G20340/At5G59820/At5G66390)                     |          |          |
|                                                                   | Response to oxidative stress              | 0006979 | 4 | 278  |                                                                              | 0.007705 | 0.007705 |
| <b><i>Specific biochemical activities/molecular functions</i></b> |                                           |         |   |      |                                                                              |          |          |
| F1                                                                |                                           |         |   |      | 6 (At2G38380/At2G38390/At4G36430/At5G39580/At5G64120/At5G66390)              |          |          |
|                                                                   | Peroxidase activity                       | 0004601 | 3 | 103  |                                                                              | 6.38E-06 | 6.38E-06 |
| F2                                                                |                                           |         |   |      | 7<br>(At2G38530/At3G61190/At4G12470/At4G12490/At4G12500/At4G39670/At5G59320) |          |          |
|                                                                   | Lipid binding                             | 0008289 | 3 | 229  |                                                                              | 7.07E-05 | 7.07E-05 |
| F3                                                                | Ferric-chelate reductase activity         | 0000293 | 6 | 8    | 2 (At5G49730/At5G49740)                                                      | 5.23E-04 | 5.23E-04 |
| F4                                                                | Glutathione binding                       | 0043295 | 4 | 10   | 2 (At1G02920/At1G02930)                                                      | 8.36E-04 | 8.36E-04 |
| F5                                                                | Sequence-specific DNA binding             | 0003700 | 3 | 1681 | 17                                                                           | 0.001127 | 0.001127 |

(At1G27730/At1G44830/At2G40140/At2G44840/At2G45660/At2G46400/At4G23810/At4G25470/At4G39250/At5G10140/At5G41020/At5G43170/At5G47230/At5G51190/At5G59820/At5G61600/At5G65080)

### Specific cellular/complex components

|    |                                 |         |   |    |                         |          |          |
|----|---------------------------------|---------|---|----|-------------------------|----------|----------|
| C1 | Plastid small ribosomal subunit | 0000312 | 5 | 19 | 2 (AtCG00800/AtCG00820) | 0.003096 | 0.003096 |
|----|---------------------------------|---------|---|----|-------------------------|----------|----------|

7  
(At2G19970/At2G22860/At2G43520/At2G43620/At  
5G49360/At5G59320/At5G64120)

|    |    |
|----|----|
| C5 | 20 |
|----|----|

20  
(At1G02920/At1G13220/At1G27730/At1G44830/At1G67230/At1G68790/At2G44840/At2G45660/At2G

|         |         |   |      |                                            |          |          |
|---------|---------|---|------|--------------------------------------------|----------|----------|
| Nucleus | 0005634 | 5 | 2435 | 1G67230/At1G68790/At2G44840/At2G45660/At2G | 0.004791 | 0.004791 |
|---------|---------|---|------|--------------------------------------------|----------|----------|

46400/At4G14760/At4G23810/At4G25470/At5G026  
00/At5G40340/At5G43170/At5G47230/At5G48600/  
At5G51190/At5G61600/At5G65080)

|    |                  |         |   |   |               |         |         |
|----|------------------|---------|---|---|---------------|---------|---------|
| C6 | Integrin complex | 0008305 | 5 | 2 | 1 (At3G28300) | 0.00873 | 0.00873 |
|----|------------------|---------|---|---|---------------|---------|---------|

<sup>a</sup>Cat, GO terms are classified as being involved in specific biological processes (P1-P15), specific biochemical activities/molecular functions (F1-F12), and specific cellular and complex compartments (C1-C6) based on the TAIR GO annotations.

<sup>b</sup>The reference referred to the number of loci annotated in the TAIR10 genome release with the specific GO term.

<sup>c</sup>Loci indicated in green and red colors are down- and up-regulated, respectively.

<sup>d</sup>Fsh, Fisher’s exact test.

<sup>e</sup>*elim*, TopGO *elim* algorithm.

---
