# Supplementary material for: The Arabidopsis Deubiquitylase OTU5 Suppresses Flowering by Histone Modification-Mediated Activation of the Major Flowering Repressors FLC, MAF4, and MAF5
Source: MDPI journal article supplement (doi:10.3390/ijms24076176), 2023-03-24
Supplement: s1 [file s1]

**Table S6.** Analyses of differential expressed genes of *otu5-1*, *arp6-1*, and *otu5 arp6*.

| DEGs <sup>a</sup> |      | Overlapped with other genotypes <sup>b</sup> |               |                  | Expression pattern comparison with other genotypes <sup>c</sup> |                   |                |                   |
|-------------------|------|----------------------------------------------|---------------|------------------|-----------------------------------------------------------------|-------------------|----------------|-------------------|
| genotype          | up   | <i>otu5-1</i>                                | <i>arp6-1</i> | <i>otu5 arp6</i> | vs <i>arp6</i>                                                  |                   | vs <i>otu5</i> |                   |
|                   |      |                                              |               |                  | up                                                              | Down or unchanged | up             | Down or unchanged |
| <i>otu5-1</i>     | 92   | -                                            | 47 (51.1)     | 59 (64.1)        | 61 (66.3)                                                       | 31 (33.7)         |                |                   |
| <i>arp6-1</i>     | 811  | 47 (5.8)                                     | -             | 539 (66.5)       |                                                                 |                   | 162 (20.0)     | 649 (80.0)        |
| <i>otu5 arp6</i>  | 947  | 59 (6.2)                                     | 539 (56.9)    | -                | 758 (80.0)                                                      | 189 (20.0)        | 247 (26.1)     | 700 (73.9)        |
| DEGs              |      | Overlapped with other genotypes              |               |                  | Expression pattern comparison with other genotypes              |                   |                |                   |
| genotype          | down | <i>otu5-1</i>                                | <i>arp6-1</i> | <i>otu5 arp6</i> | vs <i>arp6</i>                                                  |                   | vs <i>otu5</i> |                   |
|                   |      |                                              |               |                  | down                                                            | up or unchanged   | down           | up or unchanged   |
| <i>otu5-1</i>     | 177  | -                                            | 33 (18.6)     | 80 (45.2)        | 50 (28.2)                                                       | 127 (71.8)        |                |                   |
| <i>arp6-1</i>     | 320  | 33 (10.3)                                    | -             | 243 (75.9)       |                                                                 |                   | 82 (25.6)      | 238 (74.4)        |
| <i>otu5 arp6</i>  | 1578 | 80 (5.1)                                     | 243 (15.4)    | -                | 442 (28.0)                                                      | 1136 (72.0)       | 198 (12.5)     | 1380 (87.5)       |

<sup>a</sup>Up- and down-regulated DEGs were calculated on all loci matched with microarray probes, redundant probes were presented by the most up- or down-regulated locus with  $p < 0.05$ ; unmatched, chloroplast, and mitochondria probes were excluded.

<sup>b</sup>Calculated from the Venn diagrams (Figure S6), numbers in parentheses are percentages.

<sup>c</sup>The  $\log_2$  of expression fold  $\geq 0.2$  and  $\leq -0.2$  are arbitrarily defined as up- and down-regulated and the rest are unchanged.
